# Supplementary material for: Machine Learning Prediction of MACE in Older Chinese Adults Integrating Traditional and Geriatric-Specific Risk Factors: A CHARLS Cohort Analysis
Source: Research Square preprint supplement (doi:10.21203/rs.3.rs-6906133/v1), 2025-07-22
Supplement: Supplementary file 1 [file b235e4d56ccd7895b7637543.docx]

***Appendix Table A1. Predictor Importance Ranking from Pooled Logistic Regression Model.***

| Rank | Predictor | Pooled Estimate | Z-statistic | P-value |
| --- | --- | --- | --- | --- |
| 1 | History of Hypertension = Yes (vs No) | 0.614 | 7.62 | <0.001 |
| 2 | CES-D Score | 0.032 | 5.4 | <0.001 |
| 3 | Education = High+ (vs <Primary) | 0.469 | 3.17 | 0.002 |
| 4 | ADL Limitations (Count) | 0.106 | 3.11 | 0.002 |
| 5 | Waist Circumference (cm) | 0.011 | 2.79 | 0.011 |
| 6 | Age (years) | 0.016 | 2.44 | 0.015 |
| 7 | Systolic BP (mmHg) | 0.006 | 2.21 | 0.03 |
| 8 | History of Diabetes = Yes (vs No) | 0.294 | 2.04 | 0.04 |
| 9 | Education = Middle (vs <Primary) | 0.23 | 1.95 | 0.05 |
| 10 | Current Drinking = Yes (vs No) | -0.149 | -1.71 | 0.09 |
| 11 | CRP (mg/L) | 0.008 | 1.52 | 0.13 |
| 12 | Residence = Rural (vs Urban) | -0.119 | -1.51 | 0.13 |
| 13 | Creatinine (mg/dL) | -0.279 | -1.32 | 0.19 |
| 14 | Sex: Male (vs Female) | -0.15 | -1.18 | 0.24 |
| 15 | Max Grip Strength (kg) | 0.006 | 1.04 | 0.3 |
| 16 | HDL Cholesterol (mg/dL) | 0.005 | 1.02 | 0.31 |
| 17 | Current Smoking = Yes (vs No) | -0.069 | -0.75 | 0.45 |
| 18 | Diastolic BP (mmHg) | -0.003 | -0.66 | 0.51 |
| 19 | Education = Primary (vs <Primary) | 0.045 | 0.51 | 0.61 |
| 20 | Total Cholesterol (mg/dL) | -0.002 | -0.45 | 0.65 |
| 21 | BMI (kg/m^2) | -0.001 | -0.41 | 0.68 |
| 22 | Physical Activity (MET-min/week) | 0 | -0.38 | 0.71 |
| 23 | LDL Cholesterol (mg/dL) | 0.001 | 0.33 | 0.74 |
| 24 | Marital Status = Married (vs Other) | 0.08 | 0.88 | 0.38 |
| 25 | Triglycerides (mg/dL) | 0 | -0.14 | 0.89 |

Predictors ranked by the absolute magnitude of the pooled Z-statistic. Results pooled across 5 imputed datasets.

***Appendix Table A2. Parametric Coefficients from Exploratory Generalized Additive Model (GAM).***

| Predictor | Estimate | Std. Error | z value | P-value |
| --- | --- | --- | --- | --- |
| Intercept | -1.137 | 0.066 | -17.35 | <0.001 |
| Sex: Male (vs Female) | -0.25 | 0.092 | -2.71 | 0.007 |
| Edu: Primary (vs <Primary) | 0.039 | 0.087 | 0.44 | 0.66 |
| Edu: Middle (vs <Primary) | 0.229 | 0.115 | 1.98 | 0.05 |
| Edu: High+ (vs <Primary) | 0.503 | 0.143 | 3.52 | <0.001 |
| Hypertension: Yes (vs No) | 0.596 | 0.078 | 7.64 | <0.001 |
| Diabetes: Yes (vs No) | 0.318 | 0.14 | 2.27 | 0.02 |
| ADL Limitations (count) | 0.104 | 0.033 | 3.14 | 0.002 |

Results from GAM fitted on the first imputed dataset. Estimates represent the change in log-odds of MACE for a one-unit change (continuous vars) or comparison to reference level (categorical vars) for linear terms included in the GAM. Reference groups for categorical predictors: Sex=Female; Education=<Primary; Hypertension=No; Diabetes=No.
